# Supplementary material for: Survey, fluorescence spectra, and solubility of liquid cyanine dyes
Source: Royal Society of Chemistry journal article supplement (doi:10.1039/c6nj02160c), 2016-01-01
Supplement: c6nj02160c1.pdf [file c6nj02160c1.pdf]

## Electronic Supplementary Information (ESI)

### Survey, fluorescence spectra, and solubility of liquid cyanine dyes

Masaki Matsui,\* Takaya Yamamoto, Yasuhiro Kubota and Kazumasa Funabiki

Department of Chemistry and Biomolecular Science,  
Faculty of Engineering, Gifu University,  
Yanagido, Gifu 501-1193, Japan

|                                                |    |
|------------------------------------------------|----|
| Figure S1. <sup>1</sup> H NMR for <b>23</b> .  | 3  |
| Figure S2. <sup>1</sup> H NMR for <b>39</b> .  | 3  |
| Figure S3. <sup>1</sup> H NMR for <b>40</b> .  | 4  |
| Figure S4. <sup>1</sup> H NMR for <b>41</b> .  | 4  |
| Figure S5. <sup>1</sup> H NMR for <b>42</b> .  | 5  |
| Figure S6. <sup>1</sup> H NMR for <b>43</b> .  | 5  |
| Figure S7. <sup>1</sup> H NMR for <b>44</b> .  | 6  |
| Figure S8. <sup>1</sup> H NMR for <b>45</b> .  | 6  |
| Figure S9. <sup>1</sup> H NMR for <b>46</b> .  | 7  |
| Figure S10. <sup>1</sup> H NMR for <b>47</b> . | 7  |
| Figure S11. <sup>1</sup> H NMR for <b>48</b> . | 8  |
| Figure S12. <sup>1</sup> H NMR for <b>49</b> . | 8  |
| Figure S13. <sup>1</sup> H NMR for <b>50</b> . | 9  |
| Figure S14. <sup>1</sup> H NMR for <b>51</b> . | 9  |
| Figure S15. <sup>1</sup> H NMR for <b>52</b> . | 10 |
| Figure S16. <sup>1</sup> H NMR for <b>53</b> . | 10 |
| Figure S17. <sup>1</sup> H NMR for <b>57</b> . | 11 |
| Figure S18. TG/DTA for <b>23</b> .             | 12 |
| Figure S19. DSC for <b>39</b> .                | 12 |
| Figure S20. DSC for <b>40</b> .                | 12 |
| Figure S21. DSC for <b>41</b> .                | 12 |

|                                 |    |
|---------------------------------|----|
| Figure S22. DSC for <b>42</b> . | 12 |
| Figure S23. DSC for <b>43</b> . | 12 |
| Figure S24. DSC for <b>46</b> . | 12 |
| Figure S25. DSC for <b>47</b> . | 12 |
| Figure S26. DSC for <b>48</b> . | 13 |
| Figure S27. DSC for <b>49</b> . | 13 |
| Figure S28. DSC for <b>52</b> . | 13 |
| Figure S29. DSC for <b>53</b> . | 13 |
| Figure S30. DSC for <b>57</b> . | 13 |

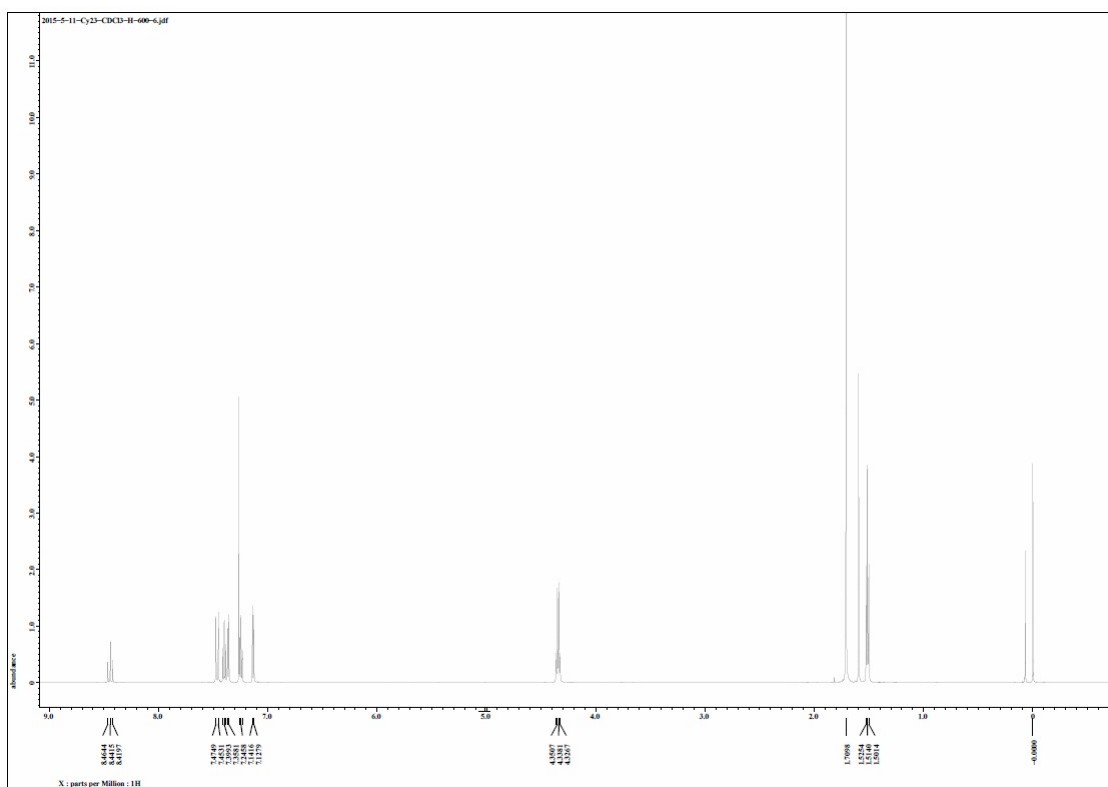

Figure S1. <sup>1</sup>H NMR for **23**.

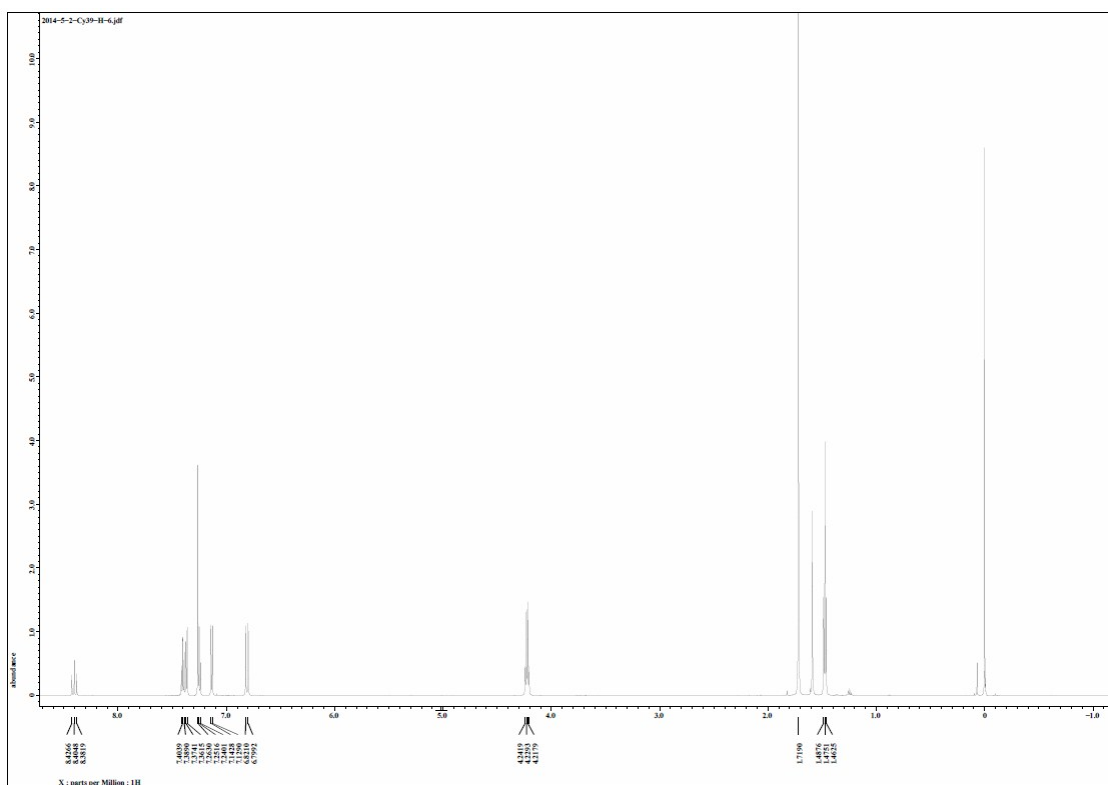

Figure S2. <sup>1</sup>H NMR for **39**.

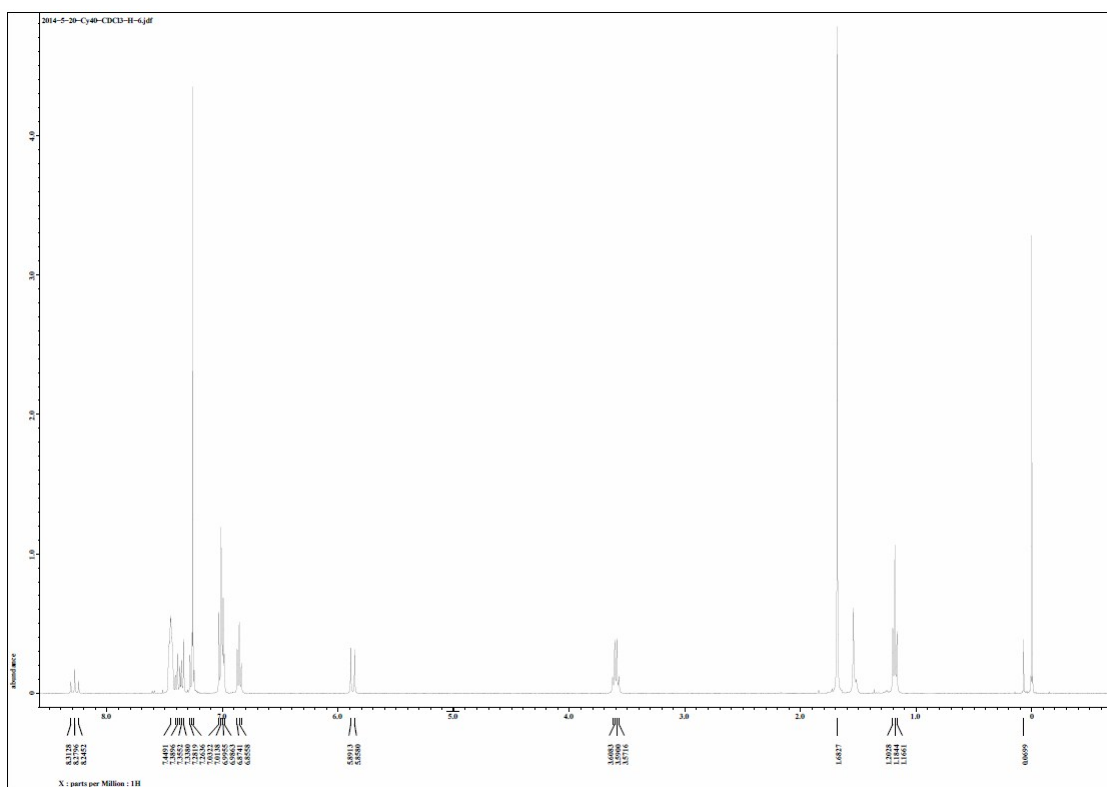

Figure S3.  $^1\text{H}$  NMR for **40**.

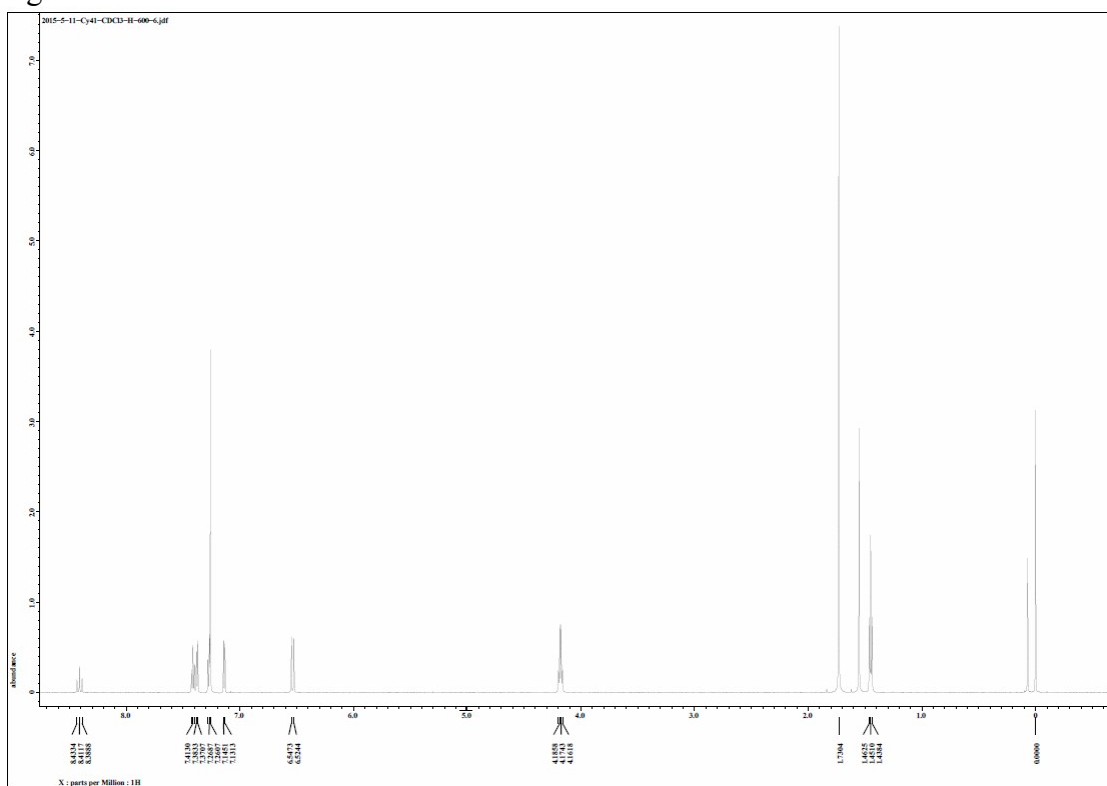

Figure S4.  $^1\text{H}$  NMR for **41**.

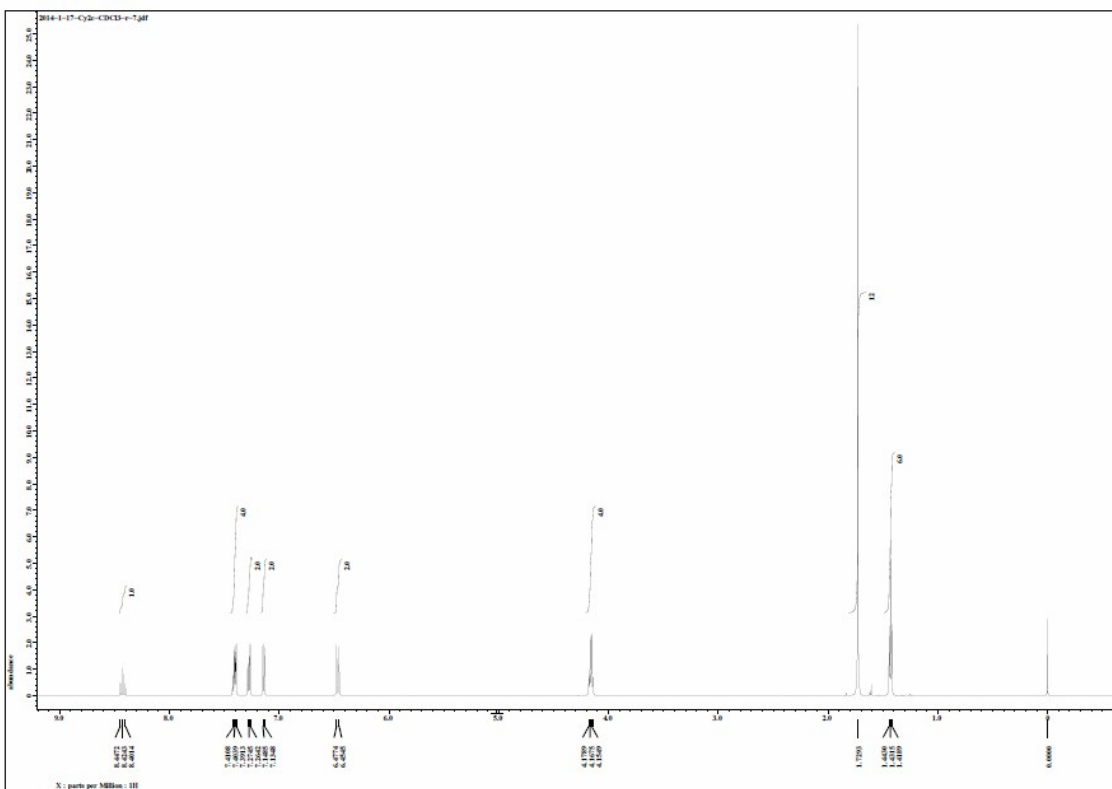

Figure S5.  $^1\text{H}$  NMR for **42**.

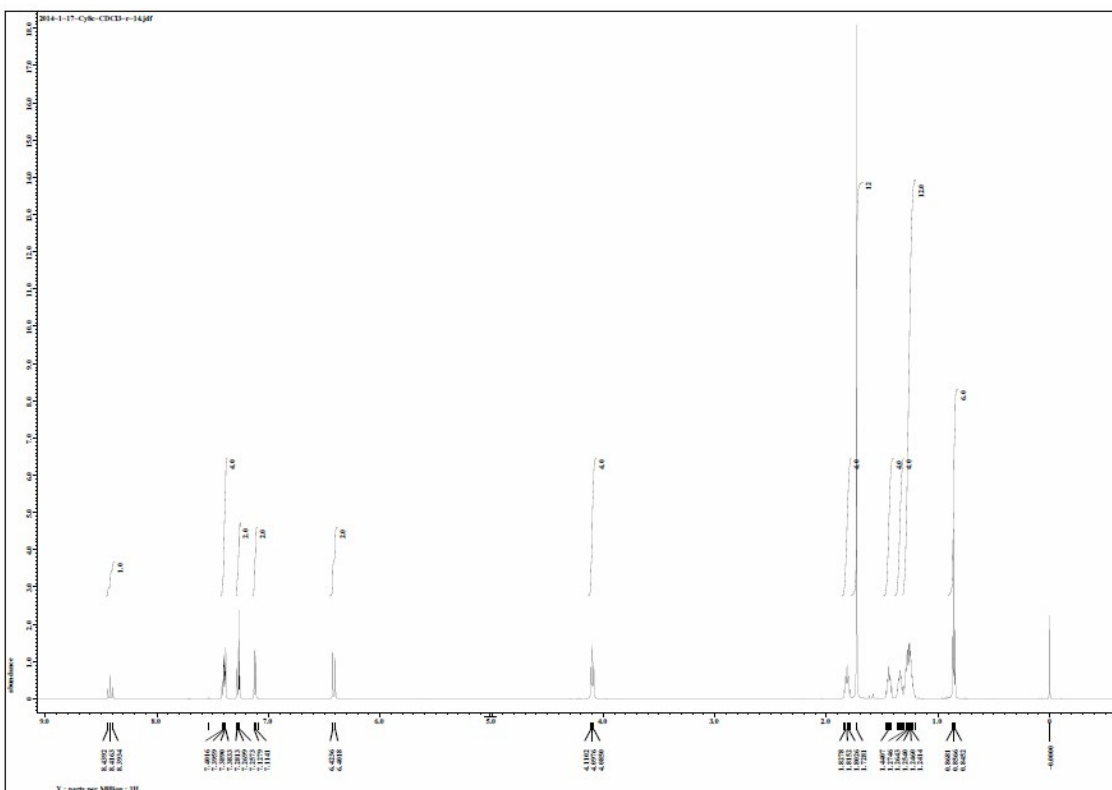

Figure S6.  $^1\text{H}$  NMR for **43**.

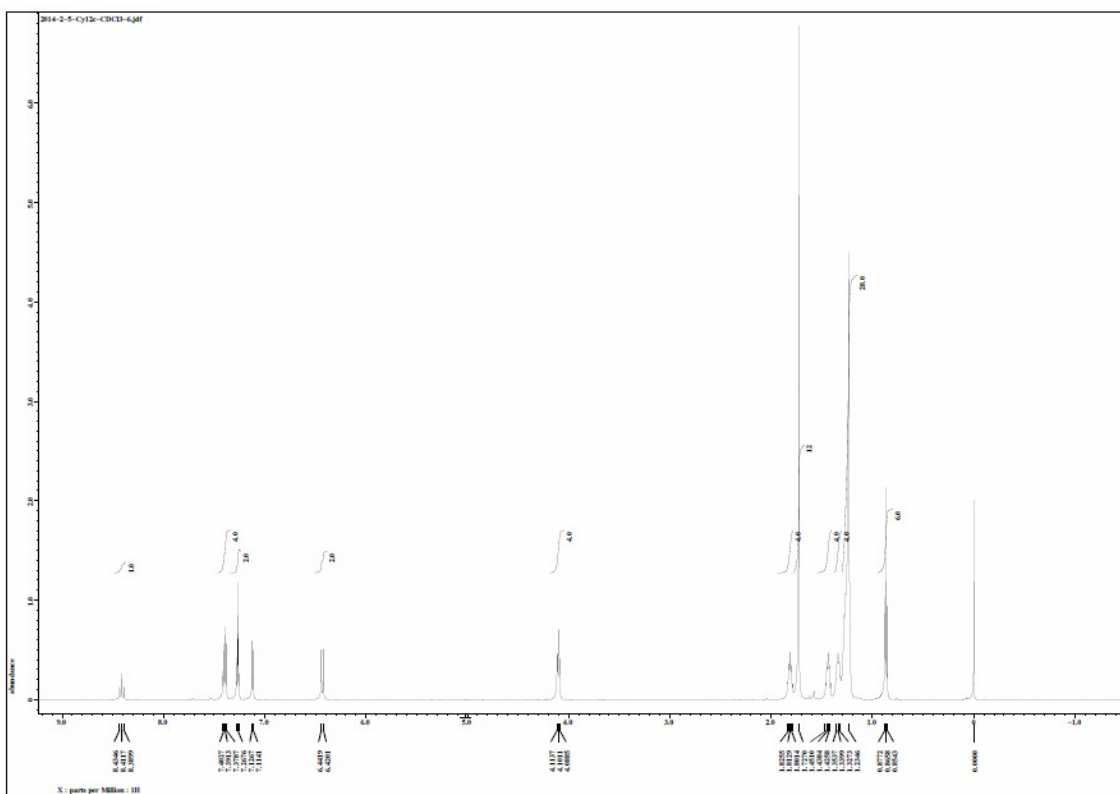

Figure S7. <sup>1</sup>H NMR for **44**.

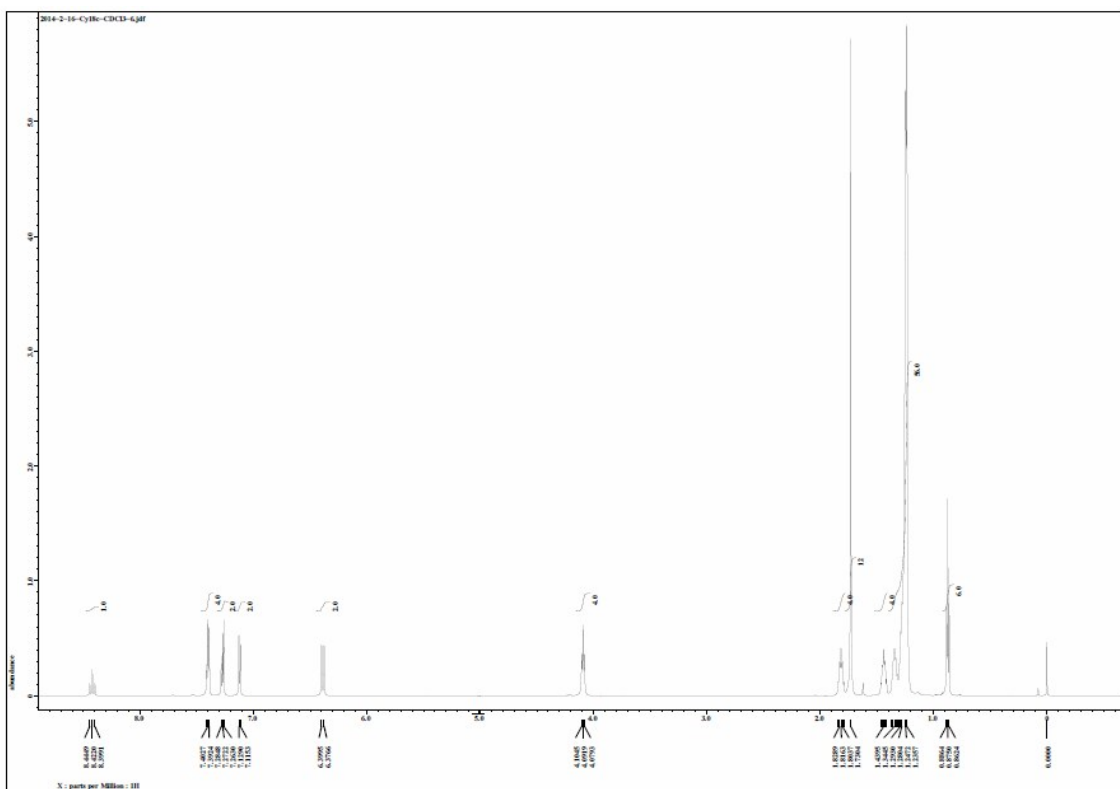

Figure S8. <sup>1</sup>H NMR for **45**.

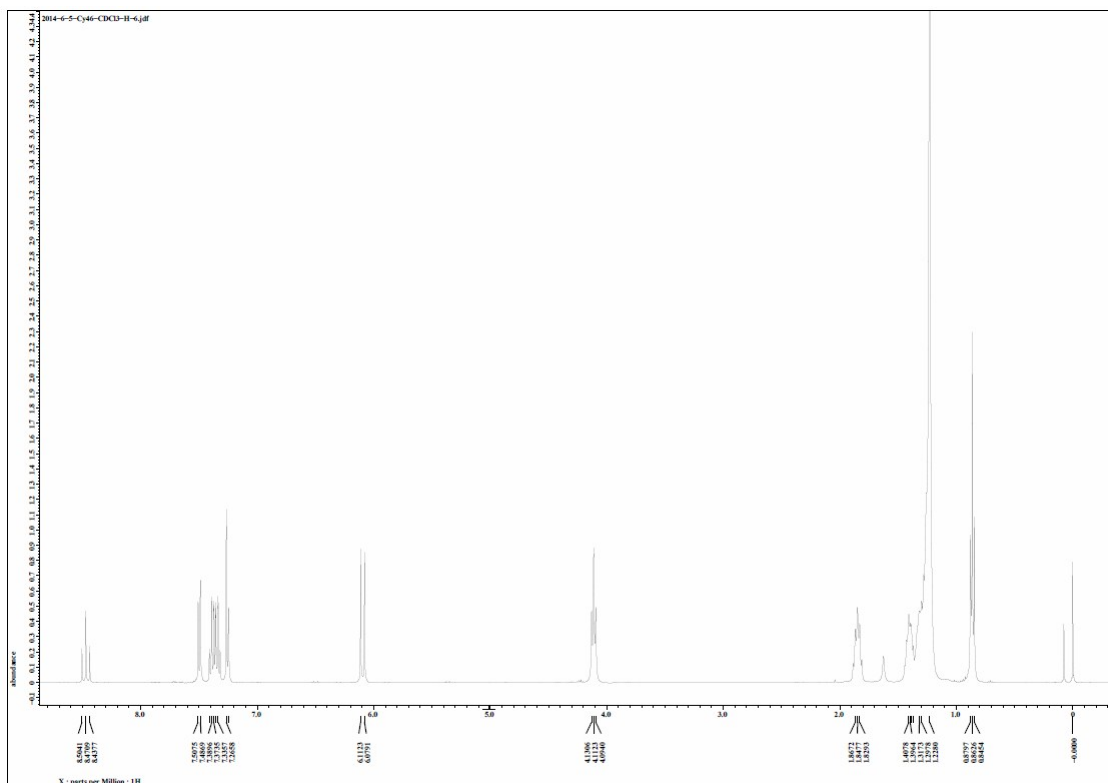

Figure S9.  $^1\text{H}$  NMR for **46**.

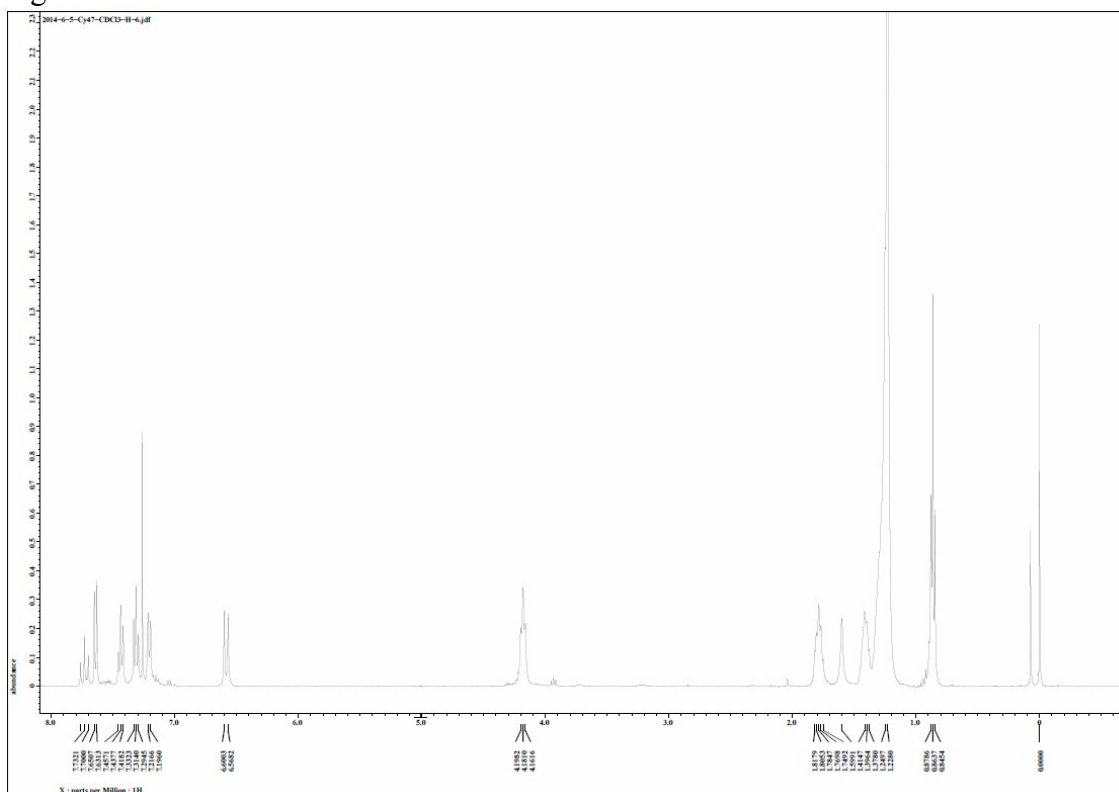

Figure S10.  $^1\text{H}$  NMR for **47**.

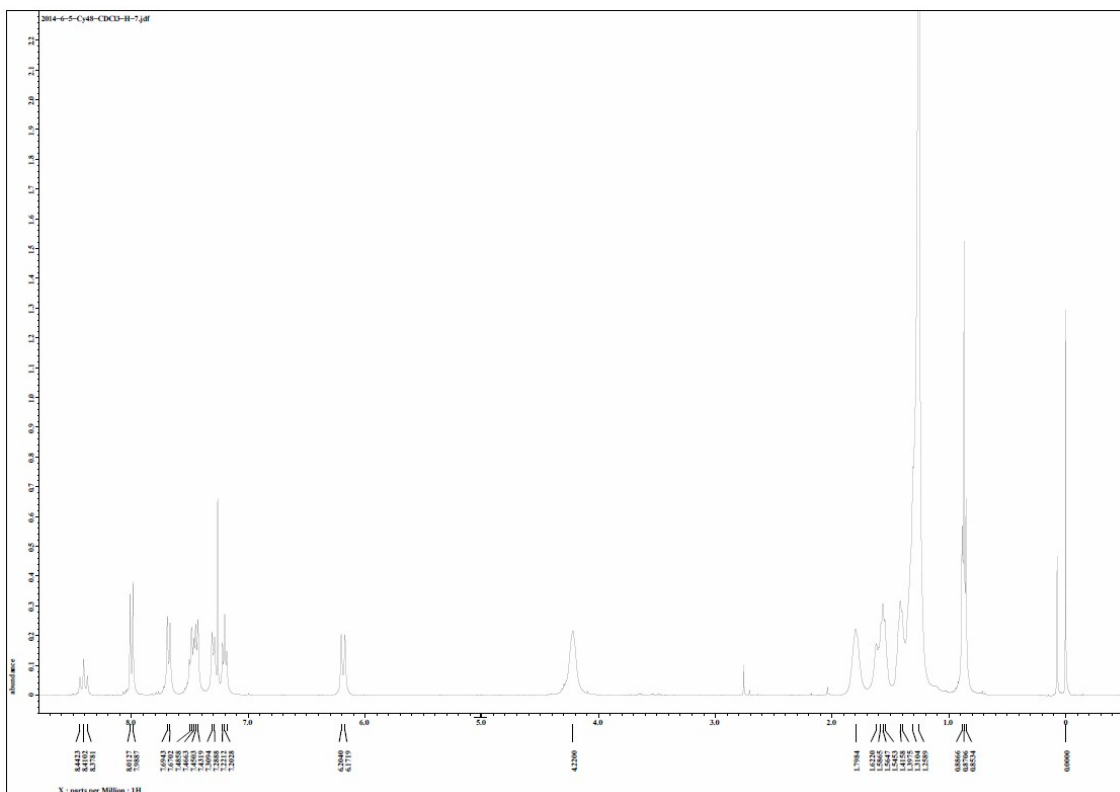

Figure S11.  $^1\text{H}$  NMR for **48**.

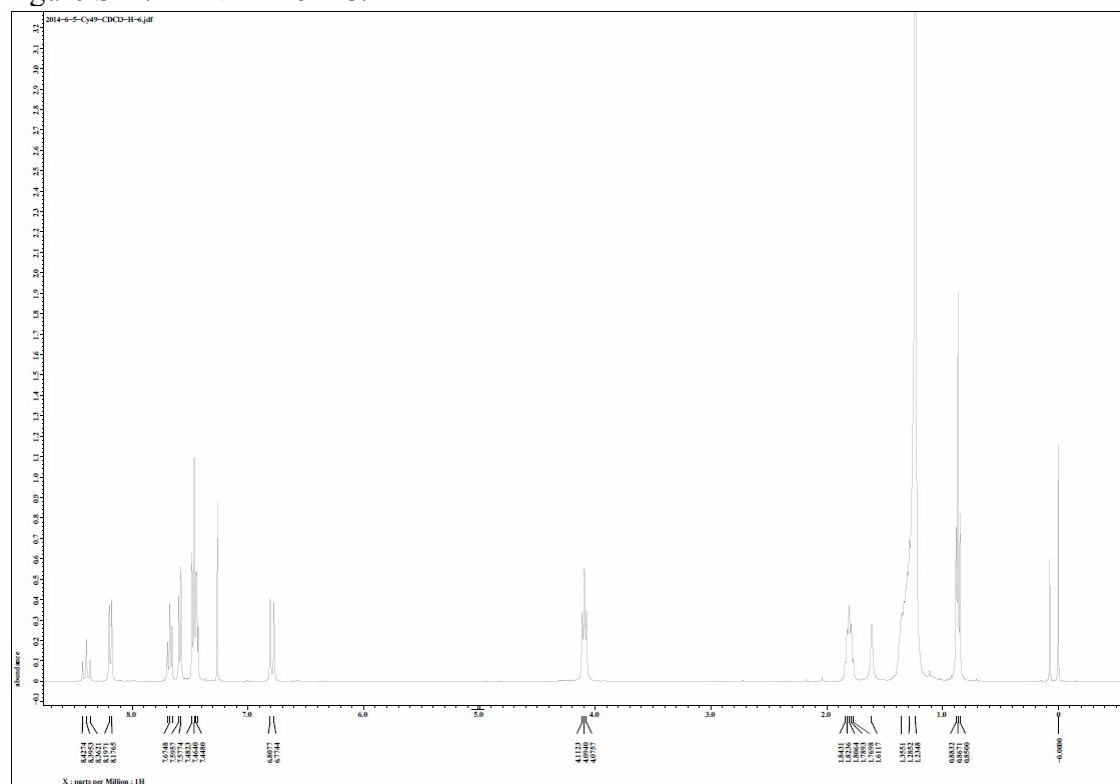

Figure S12.  $^1\text{H}$  NMR for **49**.



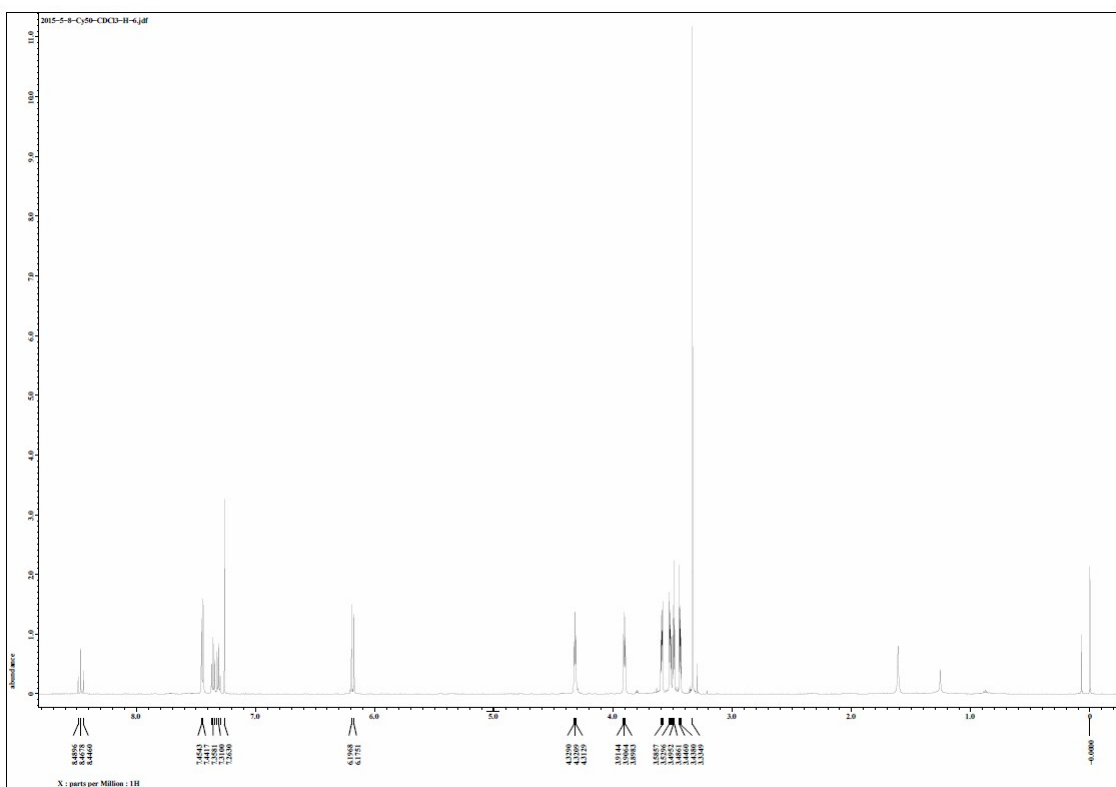

Figure S13.  $^1\text{H}$  NMR for **50**.

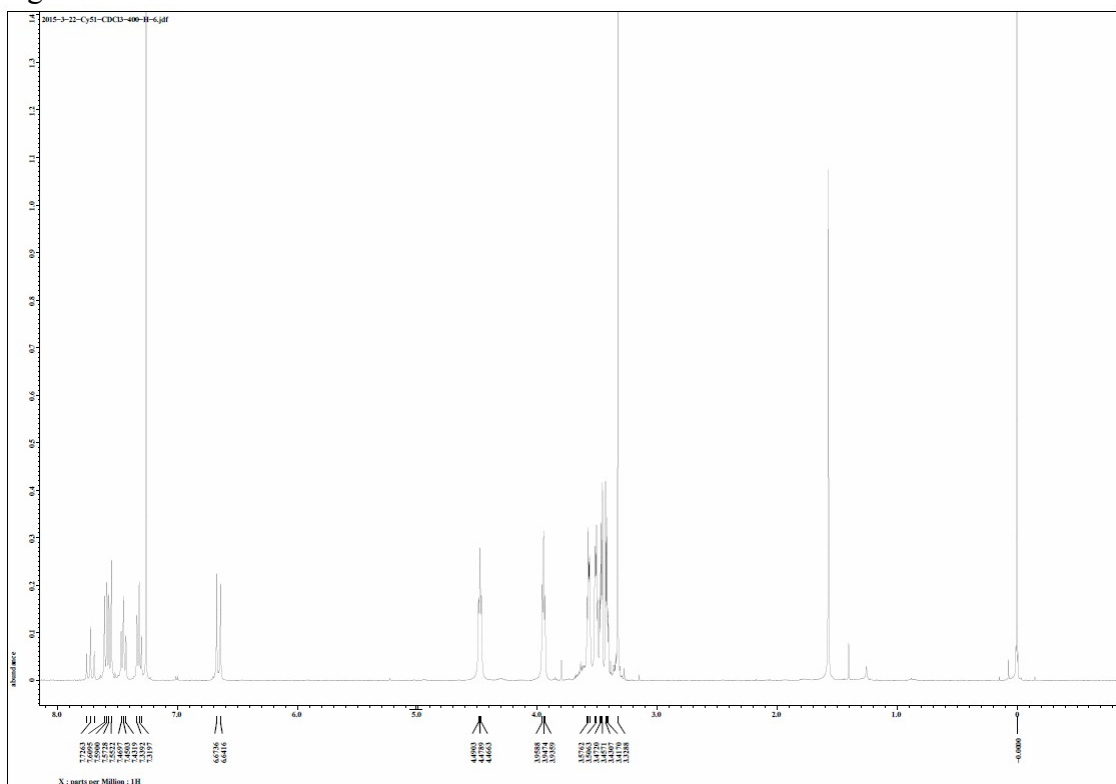

Figure S14.  $^1\text{H}$  NMR for **51**.

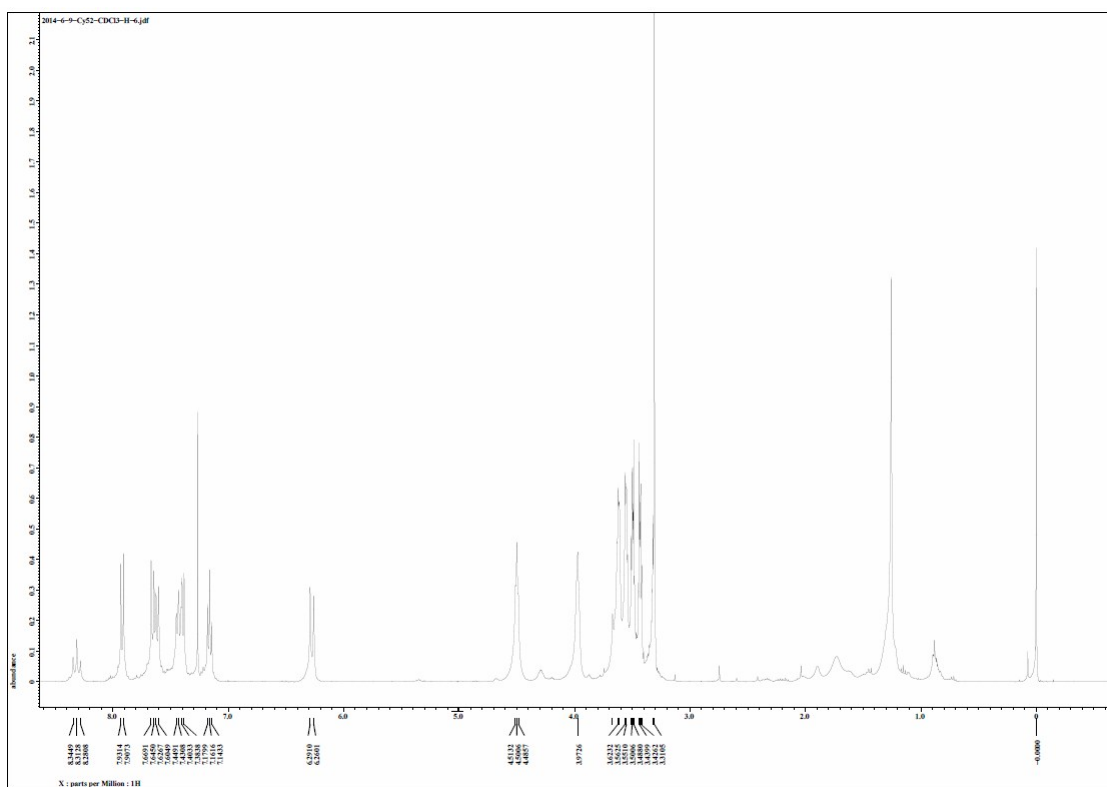

Figure S15. <sup>1</sup>H NMR for **52**.

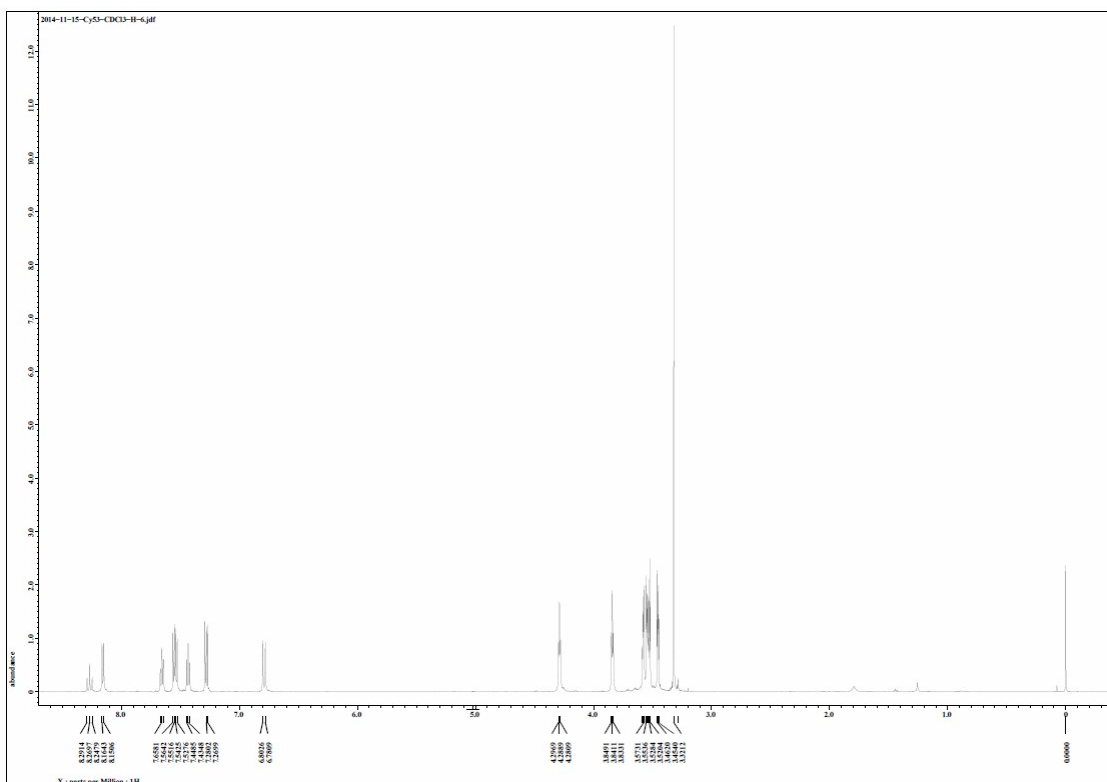

Figure S16. <sup>1</sup>H NMR for **53**.

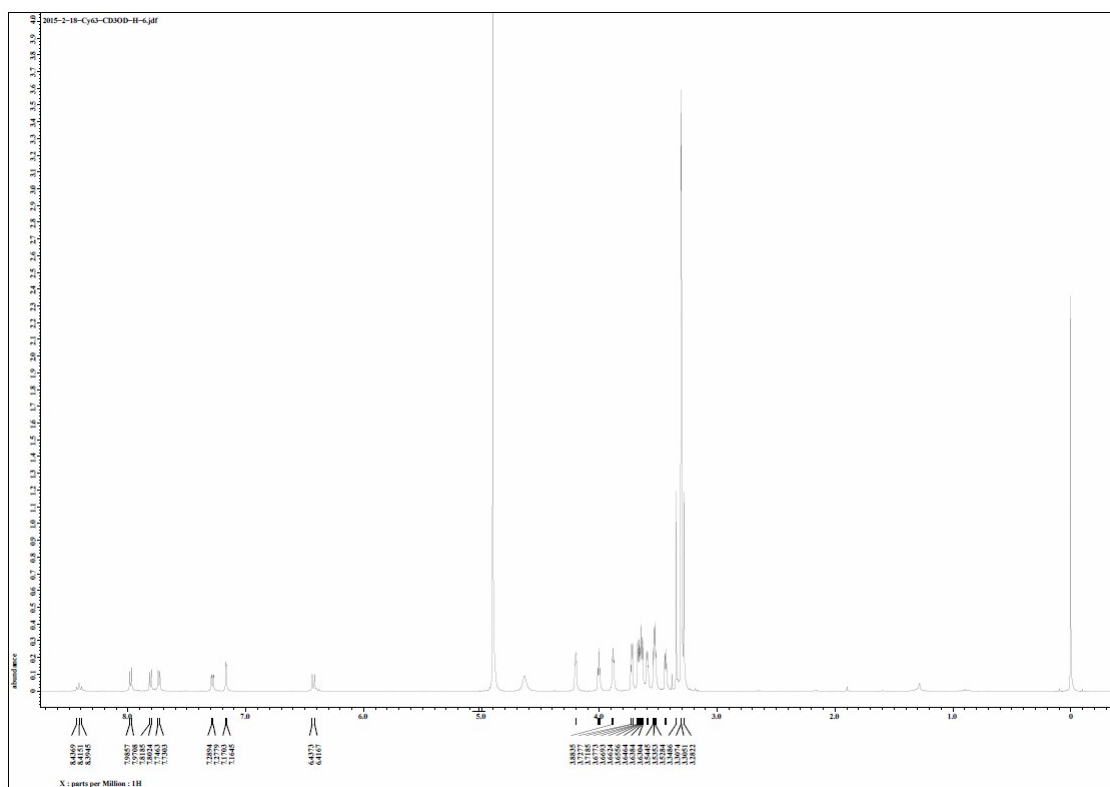

Figure S17.  $^1\text{H}$  NMR for **57**.

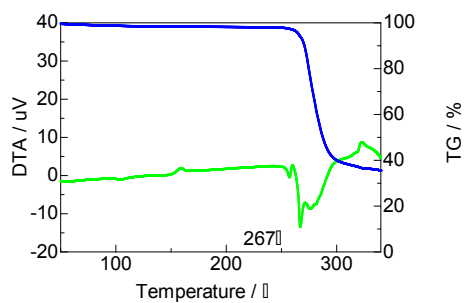

Figure S18. TG/DTA of **23**.

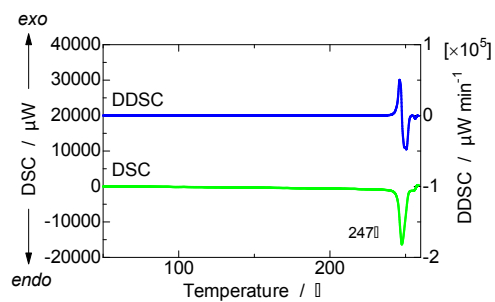

Figure S19. DSC of **39**.

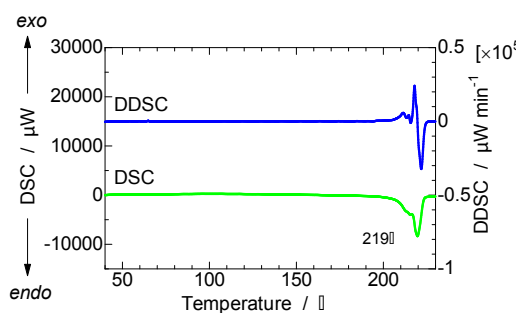

Figure S20. DSC of **40**.

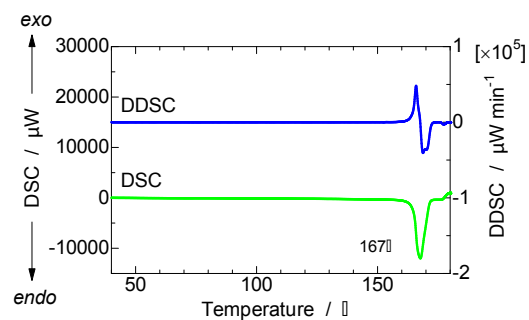

Figure S21. DSC of **41**.

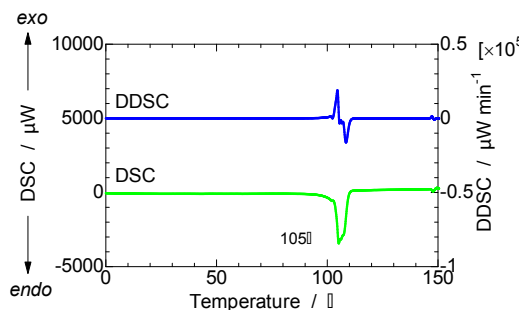

Figure S22. DSC of **42**.

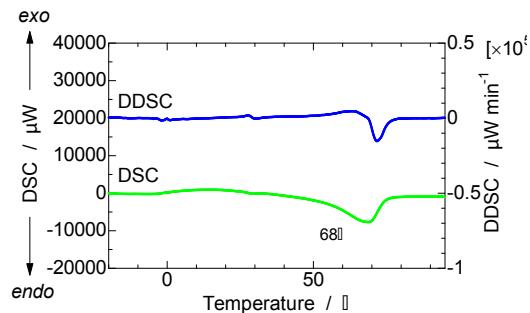

Figure S23. DSC of **43**.

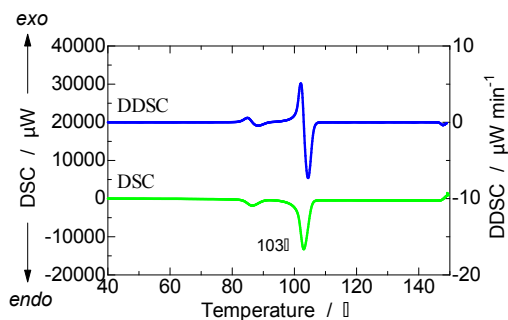

Figure S24. DSC of **46**.

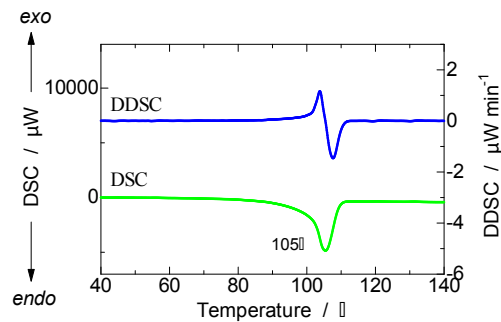

Figure S25. DSC of **47**.

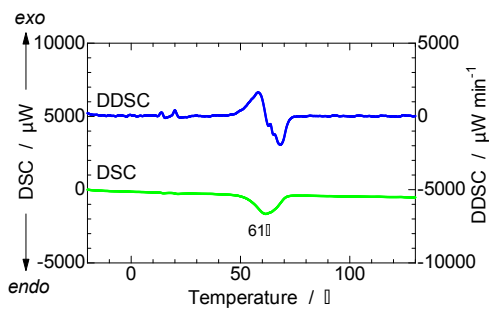

Figure S26. DSC of **48**.

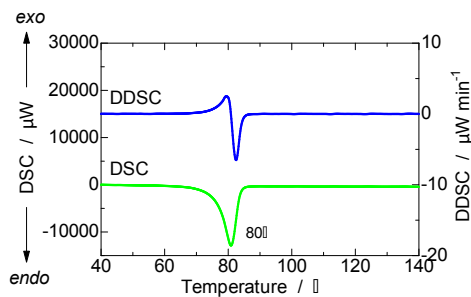

Figure S27. DSC of **49**.

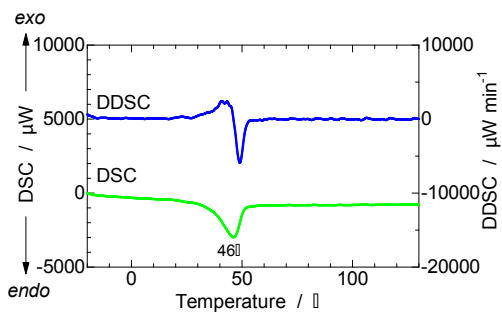

Figure S28. DSC of **52**.

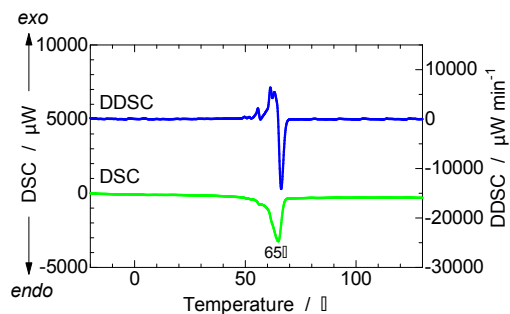

Figure S29. DSC of **53**.

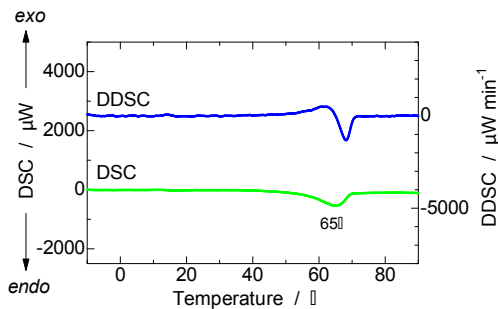

Figure S30. DSC of **57**.
